# Supplementary material for: Combination of inflammatory and vascular markers in the febrile phase of dengue is associated with more severe outcomes
Source: eLife journal article supplement (doi:10.7554/elife.67460), 2021-06-21
Supplement: supp [file elife-67460-supp-v1.zip]

Archive with 1 entries (1 files):
- elife_poa_e67460_Transparent_Reporting_File.pdf
